# Supplementary material for: Drivers and barriers to patient participation in RCTs
Source: PubMed Central journal article supplement — Br J Cancer. 2013 Mar 19;108(7):1402–7. doi: 10.1038/bjc.2013.113 (PMC3629425; doi:10.1038/bjc.2013.113), 2013-03-19

Date   /   /

CONFIDENTIAL

Appendix A

**CLINICAL TRIALS QUESTIONNAIRE**

We are interested in the reasons why patients **accept** or **decline** to take part in clinical trials/studies. We would be grateful if you would fill in this questionnaire. It will not be shown to your doctor or any of the staff at the hospital. A pre-paid envelope is provided for the return of this form.

Firstly we would like to know if you are taking part in a clinical trial/study?  Yes  No  Do not know

Below are some reasons that may have influenced your decision to accept or decline to take part in a clinical trial/study. Please answer each question and mark the box that shows most clearly how you feel with a cross in black ink i.e.

|                                                                                        | strongly<br>agree        | agree to<br>some extent  | unsure                   | disagree to<br>some extent | strongly<br>disagree     |
|----------------------------------------------------------------------------------------|--------------------------|--------------------------|--------------------------|----------------------------|--------------------------|
| 1) I thought the trial/study offered the best treatment available.                     | <input type="checkbox"/> | <input type="checkbox"/> | <input type="checkbox"/> | <input type="checkbox"/>   | <input type="checkbox"/> |
| 2) I believed the benefits of treatment in the trial/study out-weigh any side-effects. | <input type="checkbox"/> | <input type="checkbox"/> | <input type="checkbox"/> | <input type="checkbox"/>   | <input type="checkbox"/> |
| 3) I was satisfied that either treatment in the trial/study would be suitable for me.  | <input type="checkbox"/> | <input type="checkbox"/> | <input type="checkbox"/> | <input type="checkbox"/>   | <input type="checkbox"/> |
| 4) I was worried that my illness would get worse unless I joined the trial/study.      | <input type="checkbox"/> | <input type="checkbox"/> | <input type="checkbox"/> | <input type="checkbox"/>   | <input type="checkbox"/> |
| 5) The idea of randomisation worried me.                                               | <input type="checkbox"/> | <input type="checkbox"/> | <input type="checkbox"/> | <input type="checkbox"/>   | <input type="checkbox"/> |
| 6) I wanted my doctor to choose my treatment rather than be randomised by a computer.  | <input type="checkbox"/> | <input type="checkbox"/> | <input type="checkbox"/> | <input type="checkbox"/>   | <input type="checkbox"/> |

office use only:

Pat ID

Team ID

Timephase

62668

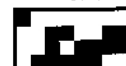

strongly agree      agree to some extent      unsure      disagree to some extent      strongly disagree

- 7) The doctor told me what I needed to know about the trial/study.
- 8) I trusted the doctor treating me.
- 9) I was given too much information to read about the trial/study.
- 10) I was given enough information to read about the trial/study.
- 11) I knew I could leave the trial/study at any time and still be treated.
- 12) I did not feel able to say no.
- 13) I wanted to help with the doctors research.
- 14) I feel that others with my illness will benefit from the results of the trial/study.
- 15) The doctor wanted me to join the trial/study.
- 16) Others, eg. family or friends wanted me to join the trial/study.

Which was the most important reason for you out of the list? (please give a number)

|  |  |
|--|--|
|  |  |
|--|--|

*Thank you very much for completing this questionnaire.*

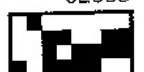

Supplement: bjc2013113x1.pdf [file bjc2013113x1.pdf]
