# Supplementary material for: Drivers and barriers to patient participation in RCTs
Source: PubMed Central journal article supplement — Br J Cancer. 2013 Mar 19;108(7):1402–7. doi: 10.1038/bjc.2013.113 (PMC3629425; doi:10.1038/bjc.2013.113), 2013-03-19

Date  /  /

CONFIDENTIAL

**Patient Feedback Questionnaire**

Dear Patient,

Your completion of this form is invaluable. It will help us give feedback to health professionals who are involved with talking to patients, like yourself, about randomised clinical trials.

Name of the person who spoke to you

|                      |                      |                      |                      |                      |                      |                      |                      |                      |                      |                      |                      |                      |                      |                      |                      |                      |                      |                      |                      |
|----------------------|----------------------|----------------------|----------------------|----------------------|----------------------|----------------------|----------------------|----------------------|----------------------|----------------------|----------------------|----------------------|----------------------|----------------------|----------------------|----------------------|----------------------|----------------------|----------------------|
| <input type="text"/> |
|----------------------|----------------------|----------------------|----------------------|----------------------|----------------------|----------------------|----------------------|----------------------|----------------------|----------------------|----------------------|----------------------|----------------------|----------------------|----------------------|----------------------|----------------------|----------------------|----------------------|

Their job title:

|                      |                      |                      |                      |                      |                      |                      |                      |                      |                      |                      |                      |                      |                      |                      |                      |                      |                      |                      |                      |
|----------------------|----------------------|----------------------|----------------------|----------------------|----------------------|----------------------|----------------------|----------------------|----------------------|----------------------|----------------------|----------------------|----------------------|----------------------|----------------------|----------------------|----------------------|----------------------|----------------------|
| <input type="text"/> |
|----------------------|----------------------|----------------------|----------------------|----------------------|----------------------|----------------------|----------------------|----------------------|----------------------|----------------------|----------------------|----------------------|----------------------|----------------------|----------------------|----------------------|----------------------|----------------------|----------------------|

The name of the trial that they discussed

|                      |                      |                      |                      |                      |                      |                      |                      |                      |                      |                      |                      |                      |                      |                      |                      |                      |                      |                      |                      |
|----------------------|----------------------|----------------------|----------------------|----------------------|----------------------|----------------------|----------------------|----------------------|----------------------|----------------------|----------------------|----------------------|----------------------|----------------------|----------------------|----------------------|----------------------|----------------------|----------------------|
| <input type="text"/> |
|----------------------|----------------------|----------------------|----------------------|----------------------|----------------------|----------------------|----------------------|----------------------|----------------------|----------------------|----------------------|----------------------|----------------------|----------------------|----------------------|----------------------|----------------------|----------------------|----------------------|

Please mark your answers with a cross clearly inside the boxes with black ink, i.e.

|                                                                                    | Not at all               | A little bit             | Some -what               | Quite a bit              | Very much                |
|------------------------------------------------------------------------------------|--------------------------|--------------------------|--------------------------|--------------------------|--------------------------|
| 1. The health care professional used clear and understandable language.            | <input type="checkbox"/> |
| 2. I understood that entry into the trial was voluntary                            | <input type="checkbox"/> |
| 3. I understood that if I agreed to take part, I could leave the trial at any time | <input type="checkbox"/> |
| 4. I understood the health care professional's explanation of randomisation        | <input type="checkbox"/> |
| 5. I felt the health care professional was sensitive to my concerns                | <input type="checkbox"/> |
| 6. I was given the opportunity to ask questions                                    | <input type="checkbox"/> |
| 7. I was left confused                                                             | <input type="checkbox"/> |

office use only: Pat ID

Team ID

Timephase

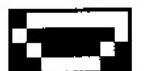

|                                                                                                 | Not at all               | A little bit             | Some -what               | Quite a bit              | Very much                |
|-------------------------------------------------------------------------------------------------|--------------------------|--------------------------|--------------------------|--------------------------|--------------------------|
| 8. I felt the health care professional listened to what I had to say                            | <input type="checkbox"/> |
| 9. I understood the treatment options available to me outside the trial                         | <input type="checkbox"/> |
| 10. I was informed of the possible side effects of the different treatments                     | <input type="checkbox"/> |
| 11. The health care professional seemed to favour one treatment over another                    | <input type="checkbox"/> |
| 12. I felt the health care professional gave me all the information I needed to make a decision | <input type="checkbox"/> |
| 13. I felt the health care professional created an atmosphere of trust, and support             | <input type="checkbox"/> |
| 14. I felt the health care professional gave me time to consider entry into the trial           | <input type="checkbox"/> |
| 15. I still have unanswered questions                                                           | <input type="checkbox"/> |
|                                                                                                 | No                       |                          | Uncertain                |                          | Yes                      |
| 16. Are you likely to join the trial?                                                           | <input type="checkbox"/> |                          | <input type="checkbox"/> |                          | <input type="checkbox"/> |

Please add any comments you have about the consultation or the trial:

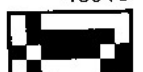

Supplement: bjc2013113x2.pdf [file bjc2013113x2.pdf]
